# Supplementary material for: Asymptomatic and symptomatic SARS-CoV-2 infections elicit polyfunctional antibodies
Source: bioRxiv or medRxiv preprint supplement (doi:10.1101/2020.11.12.20230508), 2020-11-15

Figure S1 (related to Figure 1)

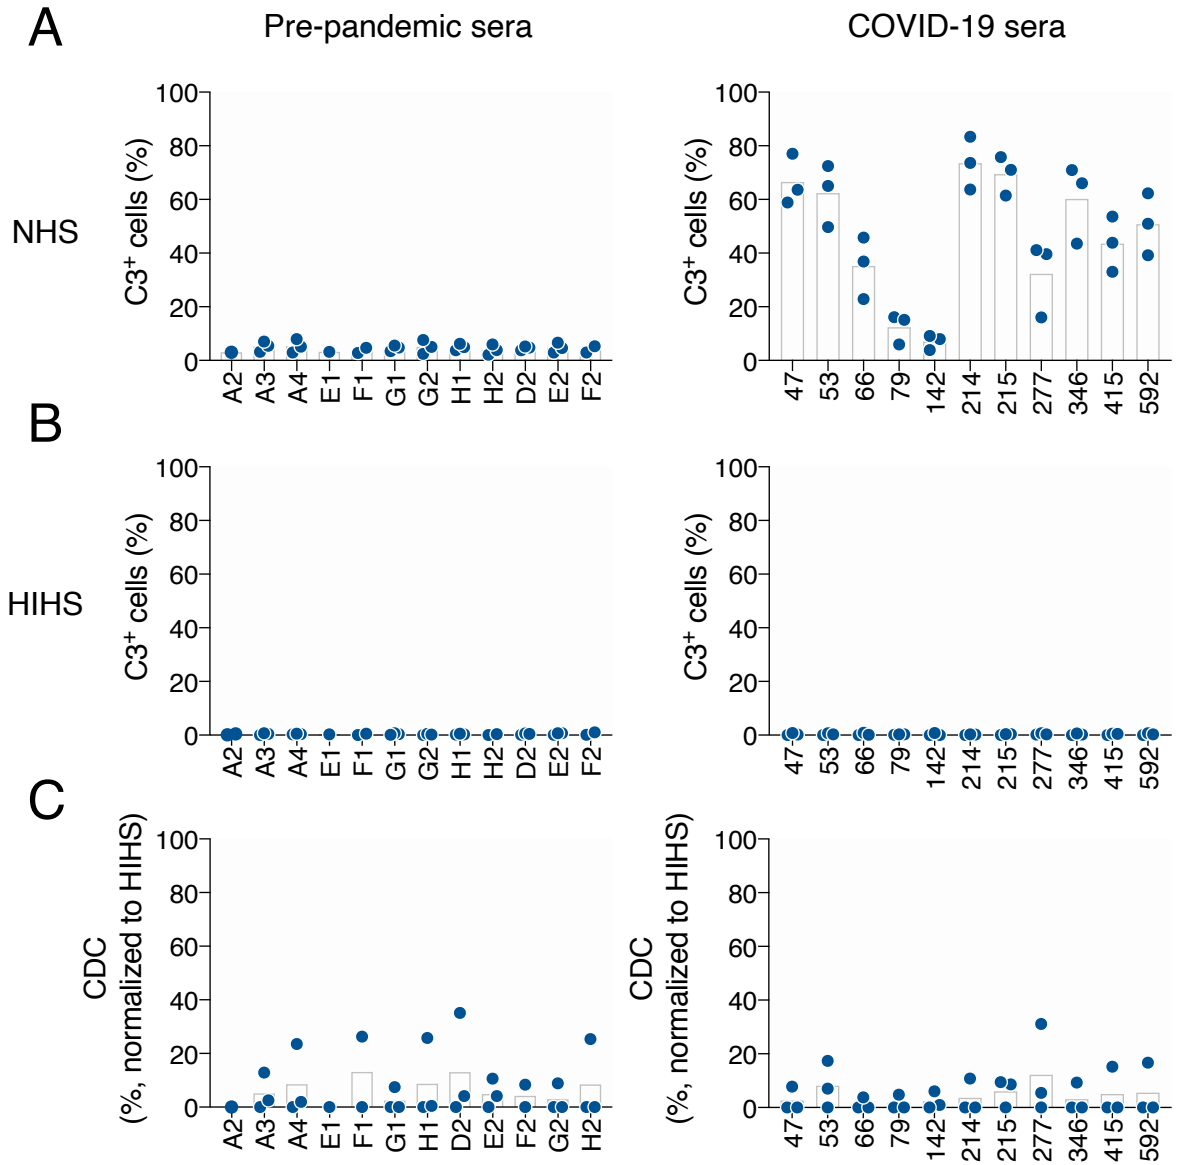

Figure S2 (related to Figure 2)

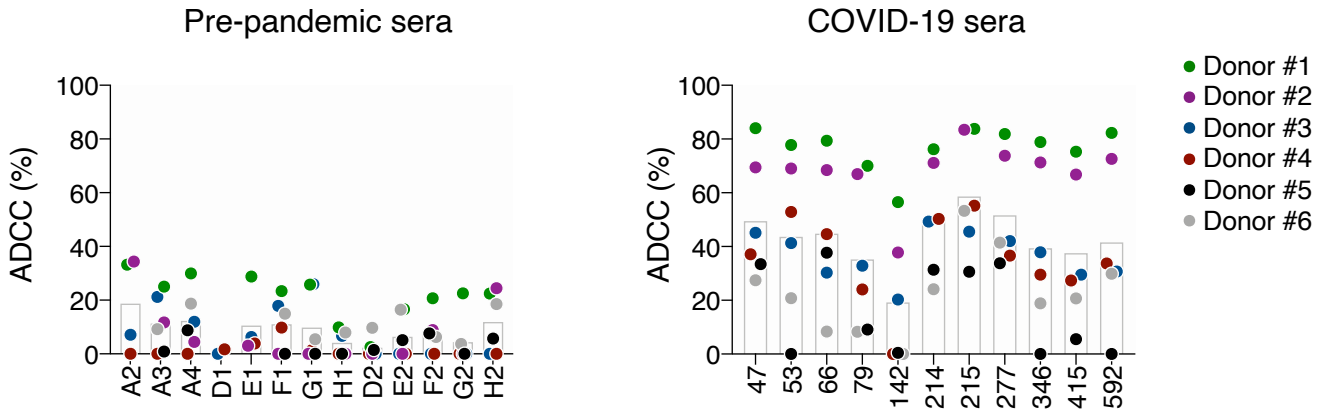

Figure S3 (related to Figure 3)

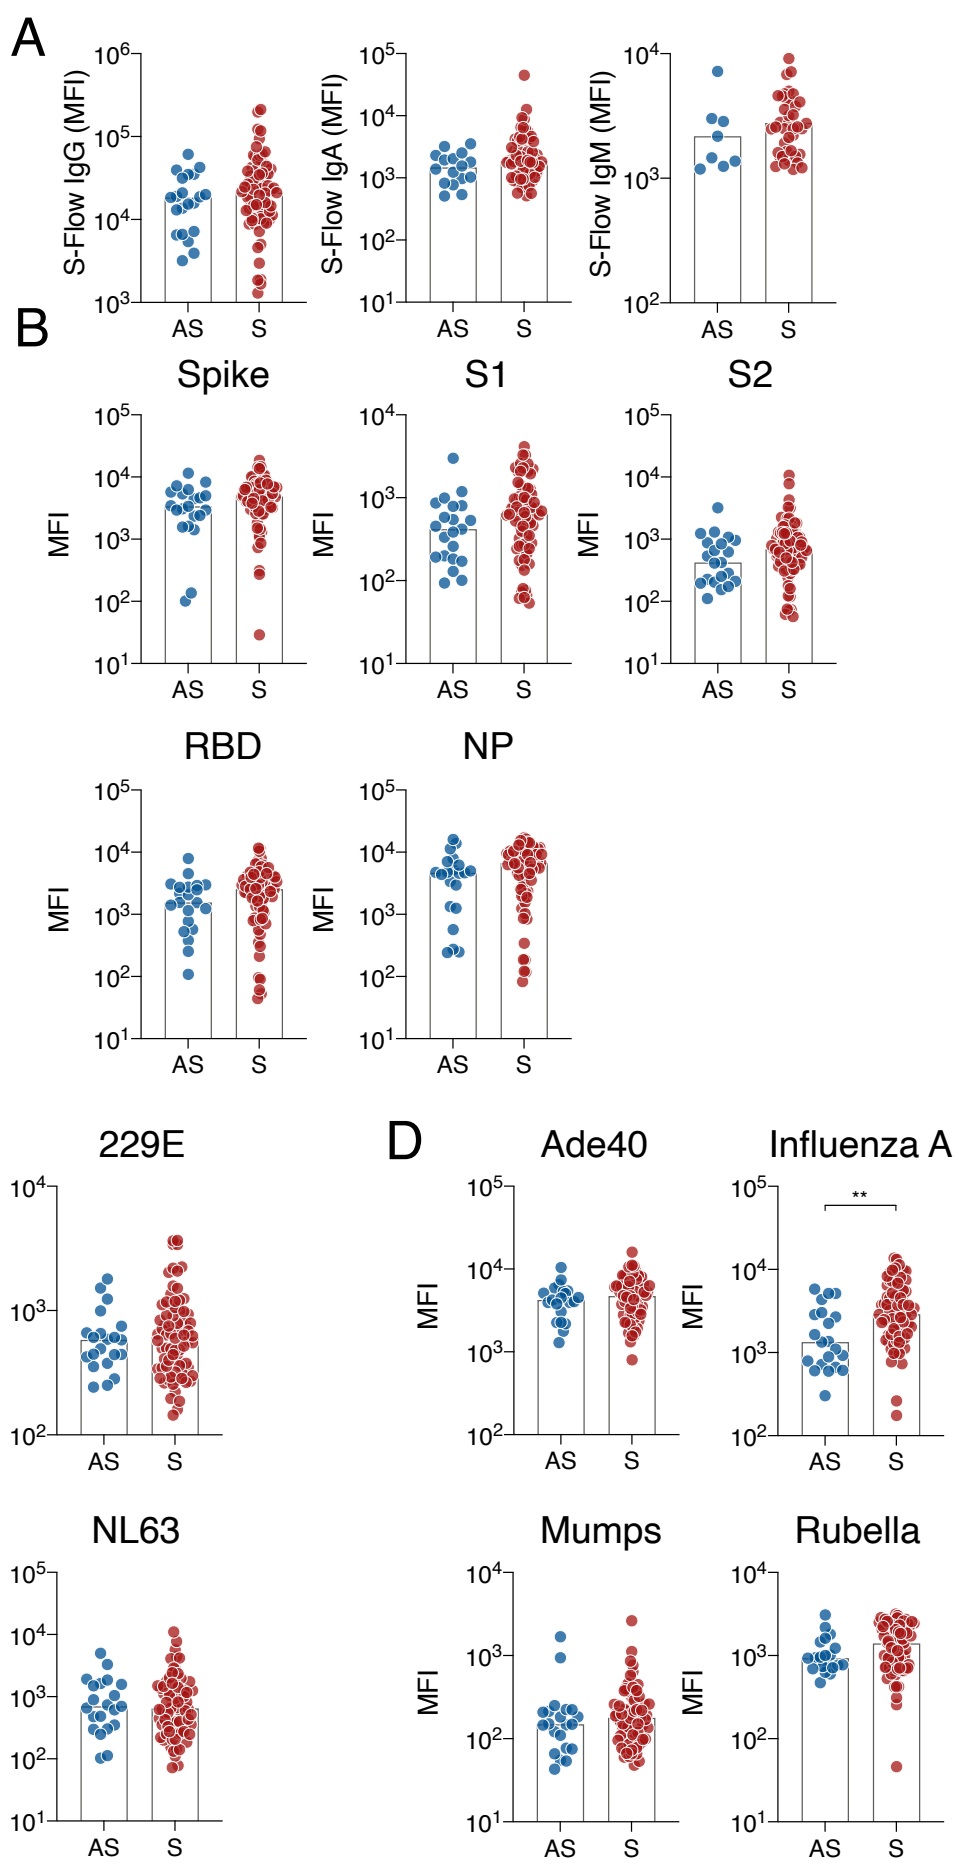

Figure S4 (related to Figure 5)

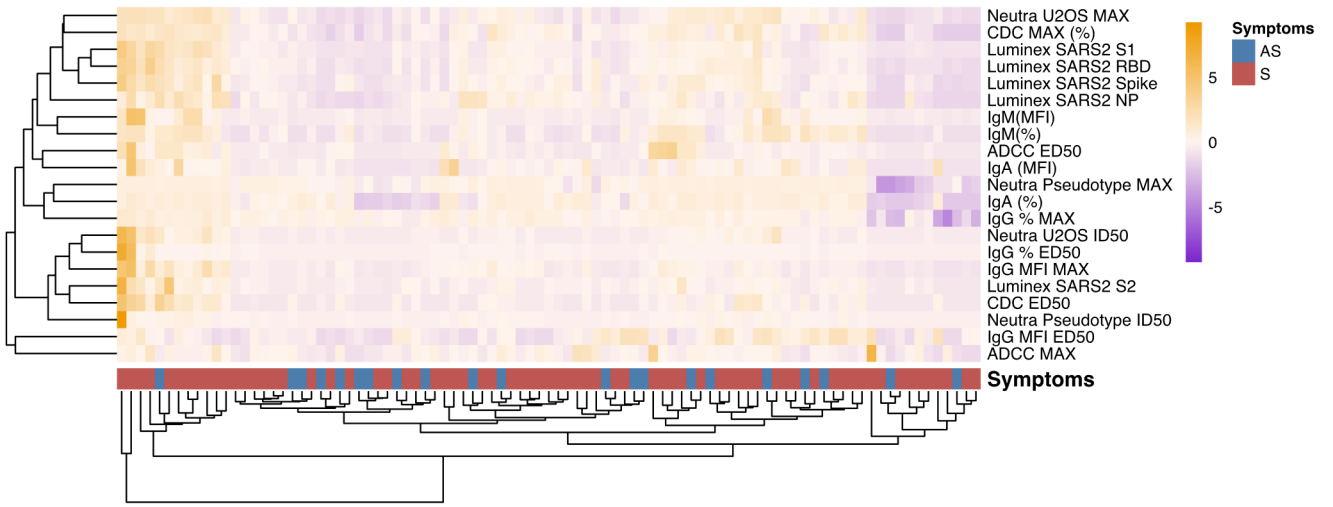

Figure S5 (related to Figure 6 and Table 1 and 2)

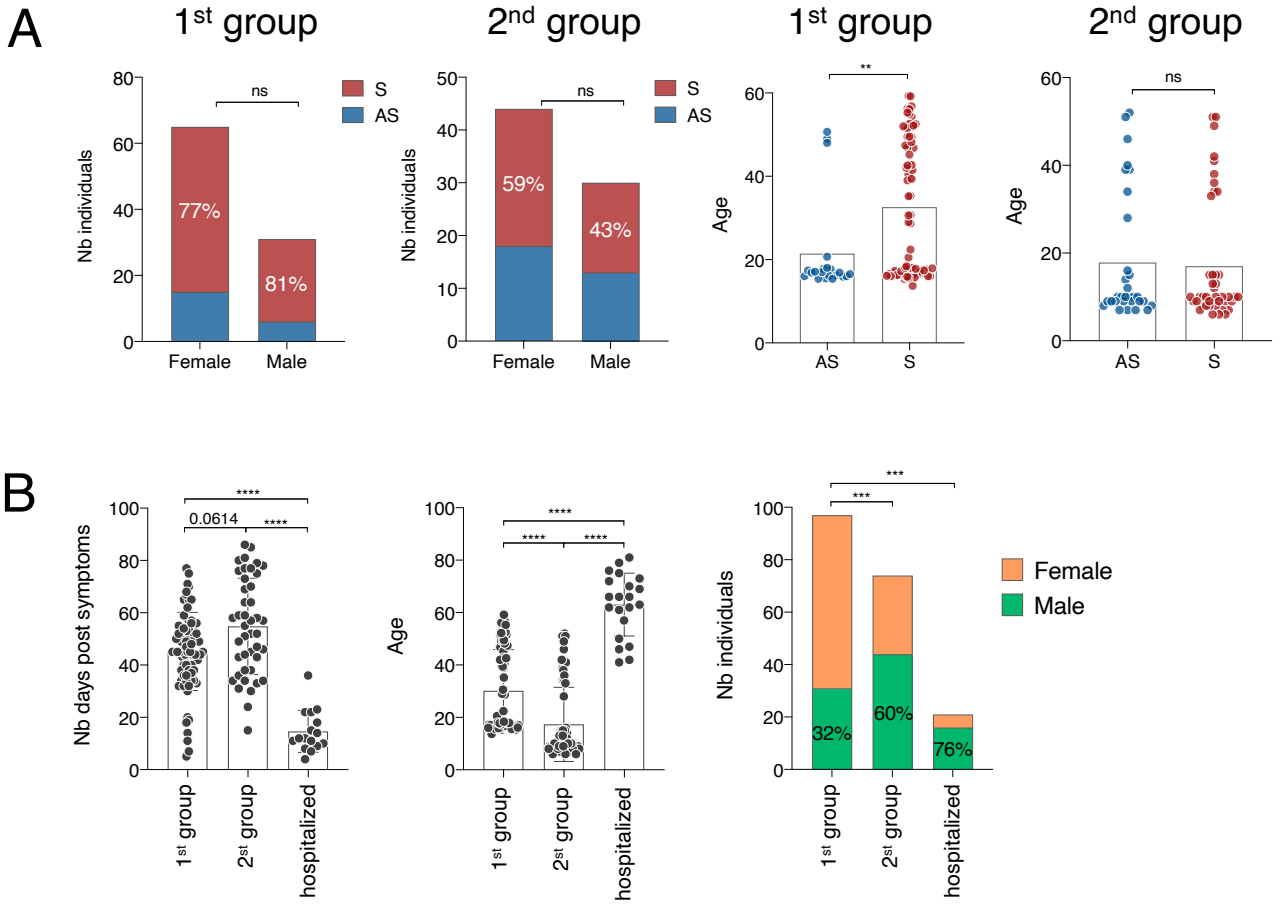

Figure S6 (related to Figure 6)

A

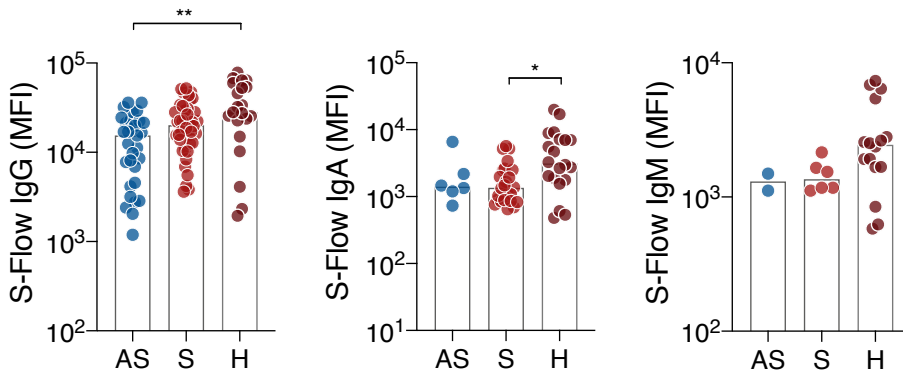

B

| Feature                              | %, in all individuals |                      |                    | MFI, in S-Flow+ individuals |            |           |
|--------------------------------------|-----------------------|----------------------|--------------------|-----------------------------|------------|-----------|
|                                      | IgG (%)               | IgA (%)              | IgM (%)            | IgG (MFI)                   | IgA (MFI)  | IgM (MFI) |
| AS vs. S p-value (Mann-Whitney test) | ns<br>0.066           | ***<br><b>0.0007</b> | *<br><b>0.0142</b> | *<br><b>0.0177</b>          | ns<br>0.74 | ns<br>0.5 |

C

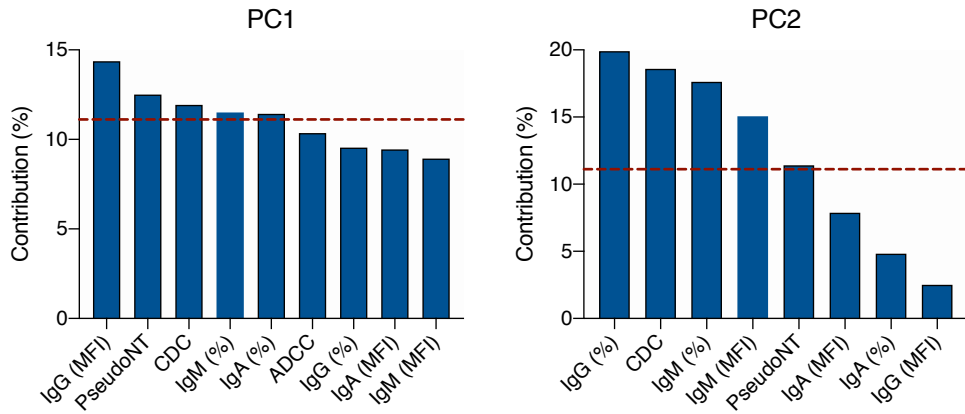

Figure S7 (related to Figure 6)

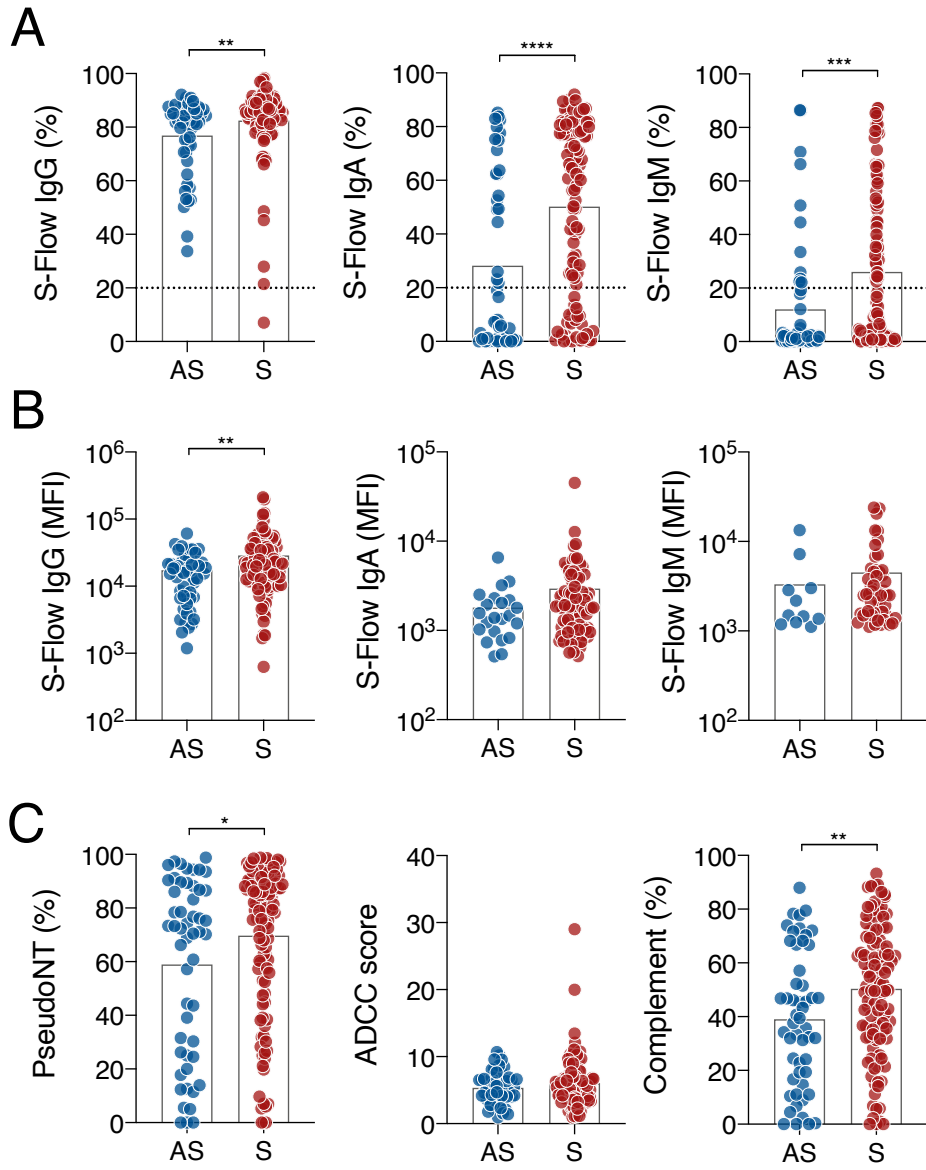

Supplement: Supplementary file [file media-1.pdf]
